# The Residents' JOURNAL

*The Residents' JOURNAL*  
a publication of  
The American Journal of Psychiatry

December 2011      Volume 6      Issue 12

**Inside**

- 1 In This Issue
- 2 Women's Mental Health and the Residents' Journal  
Sarah M. Fayad, M.D.
- 3 Sleep Disorders and Substance Abuse  
Harita Raja, M.D.
- 5 Sleep and Residency: A Brief Review  
Dawn L. Flouin, M.D.
- 7 Psychosis and Pregnancy  
Krzysztof Mlak, M.D.
- 10 Metoprolamide-Induced Delirium  
Gaurav Mishra, M.D.
- 12 My Other Psychopharmacology Professor  
Jacob Freedman, M.D.
- 14 Test Your Knowledge
- 15 Residents' Journal Info

*In This Issue*



This issue of the *Residents' Journal* features two articles on the topic of sleep, which is an area of research encompassing a variety of different disorders. Harita Raja, M.D., discusses the effects of substance use on sleep, providing useful information on clinical effects, specific substances, and treatment. Addressing issues specific to the resident physician, Dawn L. Flouin, M.D., outlines the effects of sleep deprivation and inertia on resident performance, along with official guidelines, implemented by the Accreditation Council for Graduate Medical Education, regarding work-hour restrictions designed to improve patient safety, which may be compromised when residents are fatigued.

|                                                               |                                              |
|---------------------------------------------------------------|----------------------------------------------|
| Editor-in-Chief<br>Sarah M. Fayad, M.D.                       | Section Editor<br>Joseph M. Caronville, M.D. |
| Senior Editor<br>Joseph M. Caronville, M.D.                   | Associate Editor<br>Marita Seawell, M.D.     |
| Editor Emeriti<br>Sarah E. Johnson, M.D.<br>Melly McVey, M.D. | Guest Section Editor<br>Dawn L. Flouin, M.D. |
|                                                               | Staff Editor<br>Angela Moore                 |

The Residents' Journal accepts manuscripts authored by medical students, resident physicians, and fellows. To submit your paper, please visit the manuscript submission site at [mc.manuscriptcentral.com/appi-ajp](http://mc.manuscriptcentral.com/appi-ajp) and either create an account or use your existing account. For manuscript type, select "Residents." Then follow the instructions to upload your manuscript. Residents who are interested in participating as Guest Section Editors should e-mail the Residents' Journal Editor-in-Chief Sarah M. Fayad at [fayad@ufl.edu](mailto:fayad@ufl.edu).

See the September 2010 issue for details on the new peer review process.

The Residents' Journal is sent free-of-charge to all psychiatry residents. Anyone interested in being included on the distribution list should contact Angela Moore, the Residents' Journal staff editor at [ajp@psych.org](mailto:ajp@psych.org) with "Subscribe to Residents' Journal" in the subject line.

To access the complete Residents' Journal archives, visit [ajp.psychiatryonline.org/misc/Residents\\_Journal.dtl](http://ajp.psychiatryonline.org/misc/Residents_Journal.dtl)

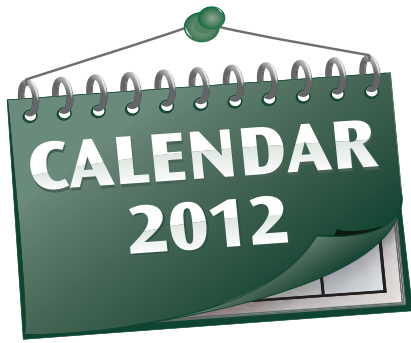

*For free listing of your organization's official annual or regional meeting, please send us the following information: sponsor, location, inclusive dates, type and number of continuing education credits (if available), and the name, address, and telephone number of the person or group to contact for more information. In order for an event to appear in our listing, all notices and changes must be received at least 6 months in advance of the meeting and should be addressed to:*

**Calendar, American Journal of Psychiatry, 1000 Wilson Boulevard, Suite 1825, Arlington, VA 22209-3901, [swestrade@psych.org](mailto:swestrade@psych.org) (e-mail).**

*Because of space limitations, only listings of meetings of the greatest interest to Journal readers may be included.*

---

## MARCH

**March 8–10**, 41st Annual Meeting, American Association of Directors of Psychiatric Residency Training, San Diego, Calif. Contact: (717) 270-1673 or visit [aadpr@verizon.net](mailto:aadpr@verizon.net) (web site).

**March 21–24**, 23rd Annual Meeting, American Neuropsychiatric Association, New Orleans, La. Contact: (614) 447-2077 or visit [www.anpaonline.org](http://www.anpaonline.org) (web site).

---

## APRIL

**April 22–25**, Annual Meeting of the North American Society for Psychosocial Obstetrics and Gynecology (NASPOG), Providence, R.I. Contact NASPOG National Office, 8213 Lakenheath Way, Potomac, MD 20854; (301) 983-6282 (tel); [info@naspog.org](mailto:info@naspog.org) (email); [www.naspog.org](http://www.naspog.org) (web site).

---

## MAY

**May 3–5**, 56th Annual Meeting, American Academy of Psychoanalysis and Dynamic Psychiatry, Philadelphia, Pa. Con-

tact: Executive Office, AAPDP, PO Box 30, Bloomfield, CT 06002; (888) 691-8281 (tel), (860) 286-0787 (fax), [info@aapdp.org](mailto:info@aapdp.org) (e-mail), [www.aapdp.org](http://www.aapdp.org) (web site).

**May 5–9**, 165th Annual Meeting, American Psychiatric Association, Philadelphia, Pa. Contact: APA Annual Meetings Dept., 1000 Wilson Blvd., Ste. 1825, Arlington, VA 22209; (703) 907-7815.

---

## JUNE

**June 14–16**, 38th Annual Meeting, Association of Directors of Medical Student Education in Psychiatry, Blaine, Wash. Contact: Gary L. Beck, Ph.D., (402) 559-7351; [gbeck@unmc.edu](mailto:gbeck@unmc.edu) (email).

**June 23–27**, Joint Organizational Meeting of the Organization of Teratology Information Specialists, the Teratology Society, and the Neurobehavioral Teratology Society, Baltimore, Md. Contact Ms. Dee Quinn, University of Arizona, Drachman Hall, PO Box 210202, 1295 N. Martin, Room B308, Tucson, AZ 85721-0202; (520) 626-3547 (tel); [www.otispregnancy.org](http://www.otispregnancy.org); [www.teratology.org](http://www.teratology.org); [www.nbts.org](http://www.nbts.org).

---

## OCTOBER

**October 3–5**, International Biennial Congress of the Marcé Society (International Society for the Understanding, Prevention and Treatment of Mental Illness Related to Childbearing), in collaboration with the Société Marcé Francophone, Paris, France (conducted in English). Contact: Ms. Nicole Greer, 5034-A Thoroughbred Lane, Brentwood, TN 37027 USA; (615) 324-2362 (tel); [info@marcesociety.com](mailto:info@marcesociety.com) (email); [www.marcesociety.com](http://www.marcesociety.com) (web site).

**October 4–7**, 64th Institute on Psychiatric Services, American Psychiatric Association, New York, NY. Contact: Jill Gruber, APA Annual Meetings Dept., 1000 Wilson Blvd., Ste. 1825, Arlington, VA 22209; (703) 907-7815.

---

## JUNE 2013

**June 6–9**, 4th World Congress on ADHD: From Childhood to Adult Disease, Milan, Italy. Contact Congress Organizer, +49-40-670 88 20 (tel); [adhd2013@cpo-hanser.de](mailto:adhd2013@cpo-hanser.de) (email); [www.adhd-congress.org](http://www.adhd-congress.org) (web site).

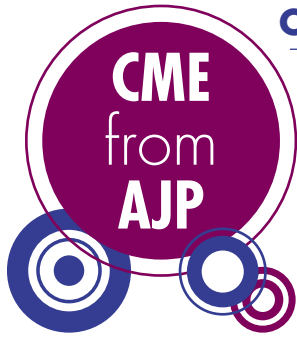

## Continuing Medical Education

Three articles in this issue form the basis of a short course with questions that can be answered for up to 1 *AMA PRA Category 1 Credit™* each by visiting <http://psychiatryonline.org/cme.aspx> and clicking on the “American Journal of Psychiatry” tab.

CME credit is issued only online, and a paid subscription to the AJP CME course program is required.

This month's courses appear on pages 237–240.

FREE AUDIO!

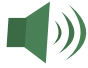

## Have You Heard?

You can listen to highlights of *The American Journal of Psychiatry* by downloading a monthly free .mp3 audio file from our web site (<http://ajp.psychiatryonline.org/audio.aspx#>) or by subscribing to the AJP Audio podcast at iTunes or other feed reader. Presented by Deputy Editor Dr. Susan Schultz or by Executive Editor Michael Roy, each month's audio lasts approximately 30 minutes and covers several research articles, the Treatment in Psychiatry feature, and one or two editorials.

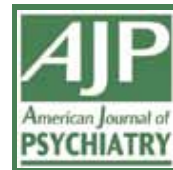

Coming in the March 2012 issue\*

## THE AMERICAN JOURNAL OF PSYCHIATRY

An Empirically Derived Taxonomy for Personality Diagnosis:  
Bridging Science and Practice in Conceptualizing Personality

D. Westen, J. Shedler, B. Bradley, and J.A. DeFife

Antiepileptic Drugs for Bipolar Disorder and the Risk of Suicidal Behavior:  
A 30-Year Observational Study

A.C. Leon, D.A. Solomon, C. Li, J.G. Fiedorowicz, W.H. Coryell, J. Endicott, and M.B. Keller

A Double-Blind Placebo-Controlled Trial of Fluoxetine for Repetitive Behaviors and  
Global Severity in Adult Autism Spectrum Disorders

E. Hollander, L. Soorya, W. Chaplin, E. Anagnostou, B.P. Taylor, C.J. Ferretti,  
S. Wasserman, E. Swanson, and C. Settiani

Association of Cerebral Emboli With Accelerated Cognitive Deterioration in  
Alzheimer's Disease and Vascular Dementia

N. Purandare, A. Burns, J. Morris, E.P. Perry, J. Wren, and C. McCollum

\*Can't wait? Visit [ajp.psychiatryonline.org/AJPInAdvance.aspx](http://ajp.psychiatryonline.org/AJPInAdvance.aspx) to see all  
articles uploaded in advance of print!

# The American Journal of PSYCHIATRY

Latest  
IMPACT  
FACTOR  
12.759!

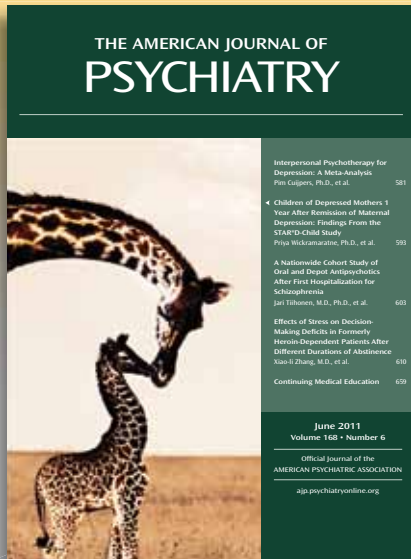

## Official Journal of the American Psychiatric Association

Edited by Robert Freedman, M.D.

- The *American Journal of Psychiatry* has an impact factor of 12.759, a rise from last year's 12.522 and 2-point rise from the previous year's 10.545, according to the recently released 2010 Journal Citation Reports® (Thomson Reuters, 2011), placing it 2nd among the 126 journals in psychiatry journals indexed, while still remaining the far-and-away leader in total citations.
- *The American Journal of Psychiatry* (AJP) is also the #2 journal in psychiatry in terms of immediacy according to Thomson Scientific's Immediacy Index. This important performance metric

is calculated by dividing the number of citations to articles published in a given year by the number of articles published in that year.

- The Immediacy Index is a good measure of how quickly a given journal's articles are cited—AJP's #2 placement is a result of publishing articles that are relevant, covering current "hot" topics and cutting-edge research, and getting these findings to the field faster with AJP in Advance, the Journal's online-ahead-of-print publication protocol.
- A recent poll conducted by the BioMedical & Life Sciences Division of The Special Libraries Association identified the 100 most influential journals in all of Biology & Medicine over the last 100 years. *The American Journal of Psychiatry* was among those honored, the only psychiatry/psychology journal represented.

No other psychiatric journal reaches more psychiatrists with greater impact or immediacy than the journal that the overwhelming majority of psychiatrists considers essential: AJP.

ISSN 0002-953X      [ajp.psychiatryonline.org](http://ajp.psychiatryonline.org)

To order a subscription, visit [www.appi.org](http://www.appi.org).

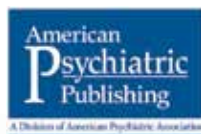

The First and Last Word in Psychiatry

[www.appi.org](http://www.appi.org) • 1-800-368-5777 • 703-907-7322

Find us on [facebook](https://www.facebook.com/ajp) and [twitter](https://twitter.com/ajp)      Priority Code AH1132
