# THE AMERICAN JOURNAL OF PSYCHIATRY

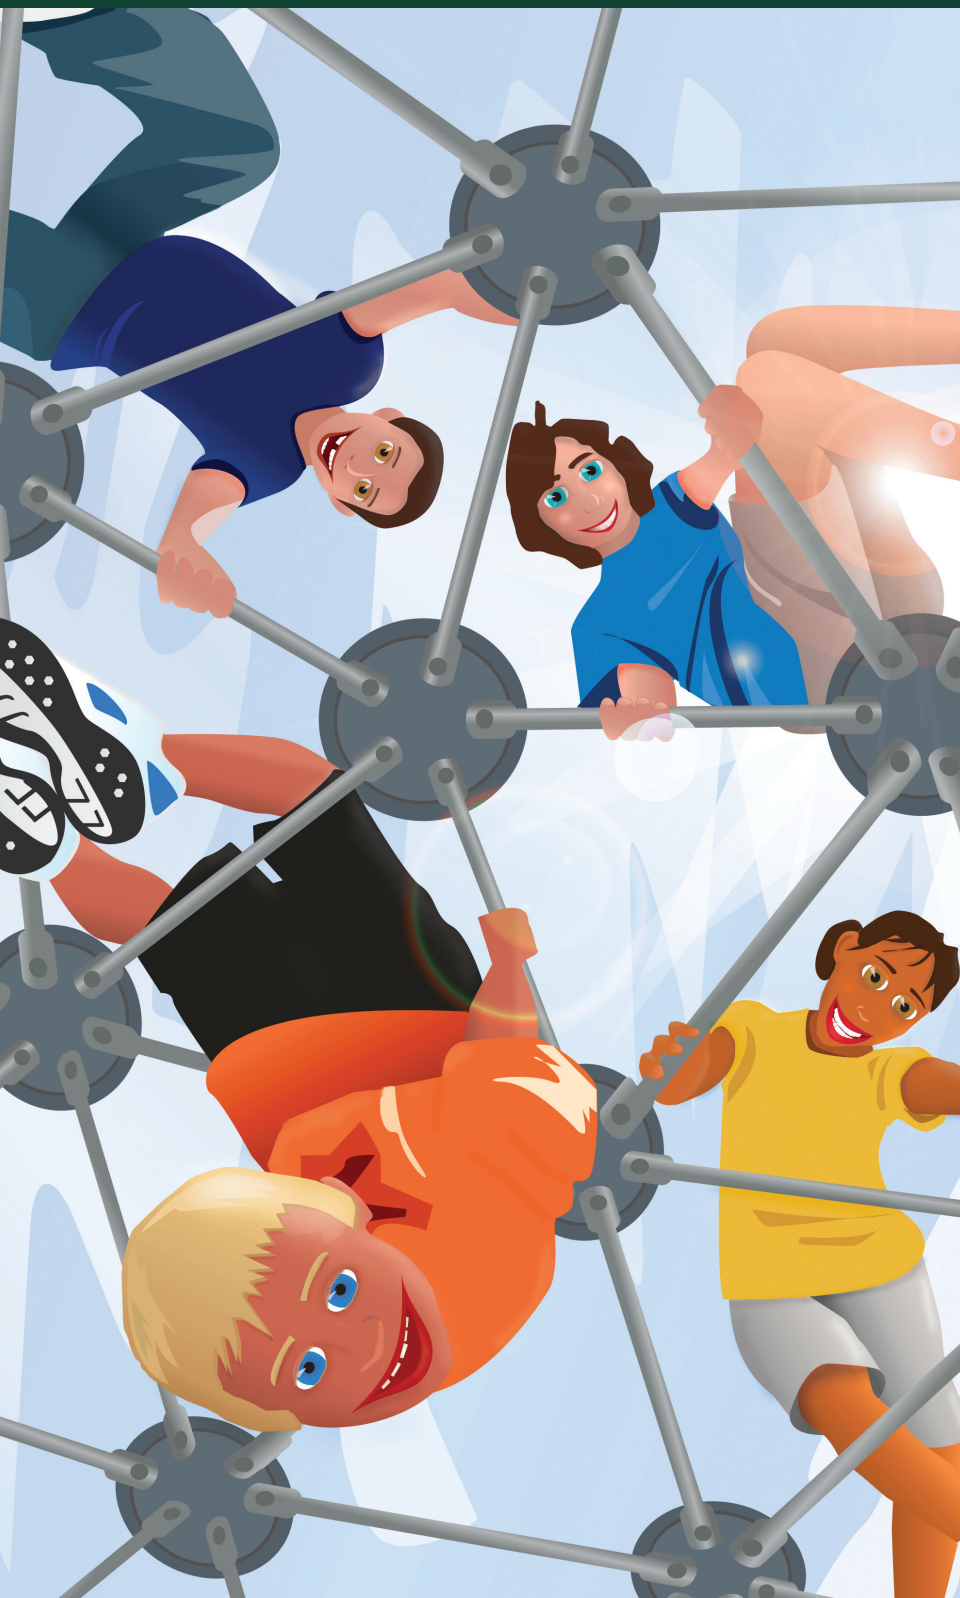

**Childhood Maltreatment Predicts Unfavorable Course of Illness and Treatment Outcome in Depression: A Meta-Analysis**

Valentina Nanni, M.D., et al.

141

**Stimulant Medication Use in Children: A 12-Year Perspective**

Samuel H. Zuvekas, Ph.D., and  
Benedetto Vitiello, M.D.

160

**Blood Pressure and Heart Rate Over 10 Years in the Multimodal Treatment Study of Children With ADHD**

Benedetto Vitiello, M.D., et al.

167

**Attention Bias Modification Treatment for Pediatric Anxiety Disorders: A Randomized Controlled Trial**

Sharon Eldar, Ph.D., et al.

213

**Continuing Medical Education**

237

**February 2012**

**Volume 169 • Number 2**

---

Official Journal of the  
AMERICAN PSYCHIATRIC ASSOCIATION

---

[ajp.psychiatryonline.org](http://ajp.psychiatryonline.org)
